# Supplementary material for: Chalcone Methoxy Derivatives Exhibit Antiproliferative and Proapoptotic Activity on Canine Lymphoma and Leukemia Cells
Source: PubMed Central journal article supplement (PMC7582533; doi:10.3390/molecules25194362), 2020-09-23
Supplement: molecules-25-04362-s001.pdf [file molecules-25-04362-s001.pdf]

## Supplementary Data

# Chalcone Methoxy Derivatives Exhibit Antiproliferative and Proapoptotic Activity on Canine Lymphoma and Leukemia Cells

Aleksandra Pawlak <sup>1,\*</sup>, Marta Henklewska <sup>1</sup>, Beatriz Hernández Suárez <sup>1</sup>, Mateusz Łuźny <sup>2</sup>, Ewa Kozłowska <sup>2</sup>, Bożena Obmińska-Mrukowicz <sup>1</sup> and Tomasz Janeczko <sup>2</sup>

<sup>1</sup> Department of Pharmacology and Toxicology, Wrocław University of Environmental and Life Sciences, C.K. Norwida 31, 50-375 Wrocław, Poland; marta.henklewska@upwr.edu.pl (M.H.); beatriz.hernandez-suarez@upwr.edu.pl (B.H.S.); b.mrukowicz@gmail.com (B.O.-M.)

<sup>2</sup> Department of Chemistry, Wrocław University of Environmental and Life Sciences, Norwida 25, 50-375 Wrocław, Poland; mateusz.luzny@upwr.edu.pl (M.Ł.); ewa.kozlowska1@upwr.edu.pl (E.K.); tomasz.janeczko@upwr.edu.pl (T.J.)

\* Correspondence: aleksandra.pawlak@upwr.edu.pl

### Content

- Figure S1. <sup>1</sup>H NMR spectral of 2'-hydroxy-2''-methoxychalcone (**1**) (CDCl<sub>3</sub>, 600 MHz).
- Figure S2. Part of the <sup>1</sup>H NMR spectral 2'-hydroxy-2''-methoxychalcone (**1**) (CDCl<sub>3</sub>, 600 MHz).
- Figure S3. <sup>13</sup>C NMR spectral of 2'-hydroxy-2''-methoxychalcone (**1**) (CDCl<sub>3</sub>, 151 MHz).
- Figure S4. COSY spectral of 2'-hydroxy-2''-methoxychalcone (**1**) (CDCl<sub>3</sub>, 151 MHz).
- Figure S5. HSQC spectral of 2'-hydroxy-2''-methoxychalcone (**1**) (CDCl<sub>3</sub>, 151 MHz).
- Figure S6. <sup>1</sup>H NMR spectral of 2'-hydroxy-3''-methoxychalcone (**2**) (CDCl<sub>3</sub>, 600 MHz).
- Figure S7. Part of the <sup>1</sup>H NMR spectral 2'-hydroxy-3''-methoxychalcone (**2**) (CDCl<sub>3</sub>, 600 MHz).
- Figure S8. <sup>13</sup>C NMR spectral of 2'-hydroxy-3''-methoxychalcone (**2**) (CDCl<sub>3</sub>, 151 MHz).
- Figure S9. HSQC spectral of 2'-hydroxy-3''-methoxychalcone (**2**) (CDCl<sub>3</sub>, 151 MHz).
- Figure S10. <sup>1</sup>H NMR spectral of 2'-hydroxy-4''-methoxychalcone (**3**) (CDCl<sub>3</sub>, 600 MHz).
- Figure S11. Part of the <sup>1</sup>H NMR spectral 2'-hydroxy-4''-methoxychalcone (**3**) (CDCl<sub>3</sub>, 600 MHz).
- Figure S12. <sup>13</sup>C NMR spectral of 2'-hydroxy-4''-methoxychalcone (**3**) (CDCl<sub>3</sub>, 151 MHz).
- Figure S13. COSY spectral of 2'-hydroxy-4''-methoxychalcone (**3**) (CDCl<sub>3</sub>, 151 MHz).
- Figure S14. HSQC spectral of 2'-hydroxy-4''-methoxychalcone (**3**) (CDCl<sub>3</sub>, 151 MHz).
- Figure S15. <sup>1</sup>H NMR spectral of 2'-hydroxy-3'',4'',5''-trimethoxychalcone (**4**) (CDCl<sub>3</sub>, 600 MHz).
- Figure S16. Part of the <sup>1</sup>H NMR spectral 2'-hydroxy-3'',4'',5''-trimethoxychalcone (**4**) (CDCl<sub>3</sub>, 600 MHz).
- Figure S17. <sup>13</sup>C NMR spectral of 2'-hydroxy-3'',4'',5''-trimethoxychalcone (**4**) (CDCl<sub>3</sub>, 151 MHz).
- Figure S18. COSY spectral of 2'-hydroxy-3'',4'',5''-trimethoxychalcone (**4**) (CDCl<sub>3</sub>, 151 MHz).
- Figure S19. HSQC spectral of 2'-hydroxy-3'',4'',5''-trimethoxychalcone (**4**) (CDCl<sub>3</sub>, 151 MHz).
- Figure S20. <sup>1</sup>H NMR spectral of 2'-hydroxy-4',6',3'',4'',5''-pentamethoxychalcone (**5**) (CDCl<sub>3</sub>, 600 MHz).
- Figure S21. Part of the <sup>1</sup>H NMR spectral 2'-hydroxy-4',6',3'',4'',5''-pentamethoxychalcone (**5**) (CDCl<sub>3</sub>, 600 MHz).
- Figure S22. <sup>13</sup>C NMR spectral of 2'-hydroxy-4',6',3'',4'',5''-pentamethoxychalcone (**5**) (CDCl<sub>3</sub>, 151 MHz).
- Figure S23. HSQC spectral of 2'-hydroxy-4',6',3'',4'',5''-pentamethoxychalcone (**5**) (CDCl<sub>3</sub>, 151 MHz).
- Figure S24. HMBC spectral of 2'-hydroxy-4',6',3'',4'',5''-pentamethoxychalcone (**5**) (CDCl<sub>3</sub>, 151 MHz).
- Figure S25. <sup>1</sup>H NMR spectral of 2'-hydroxy-2'',5''-dimethoxychalcone (**6**) (CDCl<sub>3</sub>, 600 MHz).
- Figure S26. Part of the <sup>1</sup>H NMR spectral 2'-hydroxy-2'',5''-dimethoxychalcone (**6**) (CDCl<sub>3</sub>, 600 MHz).
- Figure S27. <sup>13</sup>C NMR spectral of 2'-hydroxy-2'',5''-dimethoxychalcone (**6**) (CDCl<sub>3</sub>, 151 MHz).
- Figure S28. COSY spectral of 2'-hydroxy-2'',5''-dimethoxychalcone (**6**) (CDCl<sub>3</sub>, 151 MHz).
- Figure S29. HSQC spectral of 2'-hydroxy-2'',5''-dimethoxychalcone (**6**) (CDCl<sub>3</sub>, 151 MHz).

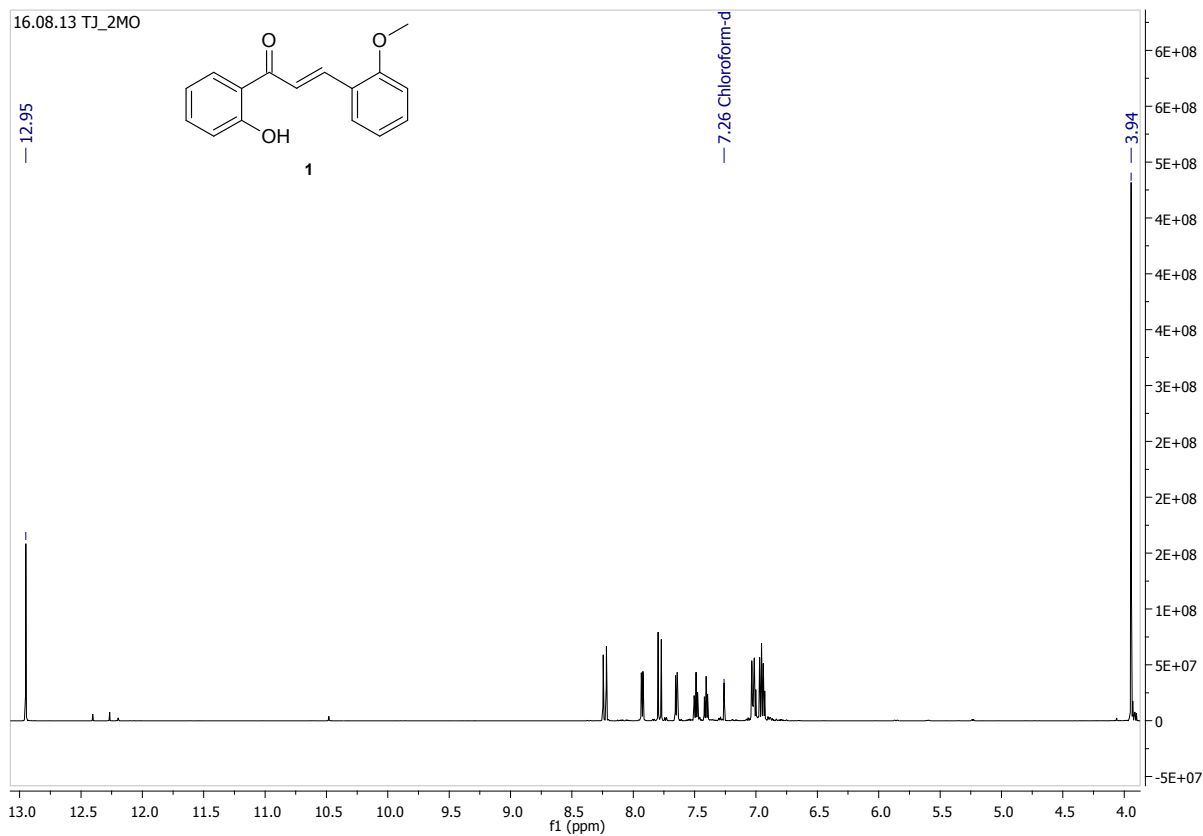

**Figure S1.**  $^1\text{H}$  NMR spectral of 2'-hydroxy-2''-methoxychalcone (**1**) ( $\text{CDCl}_3$ , 600 MHz).

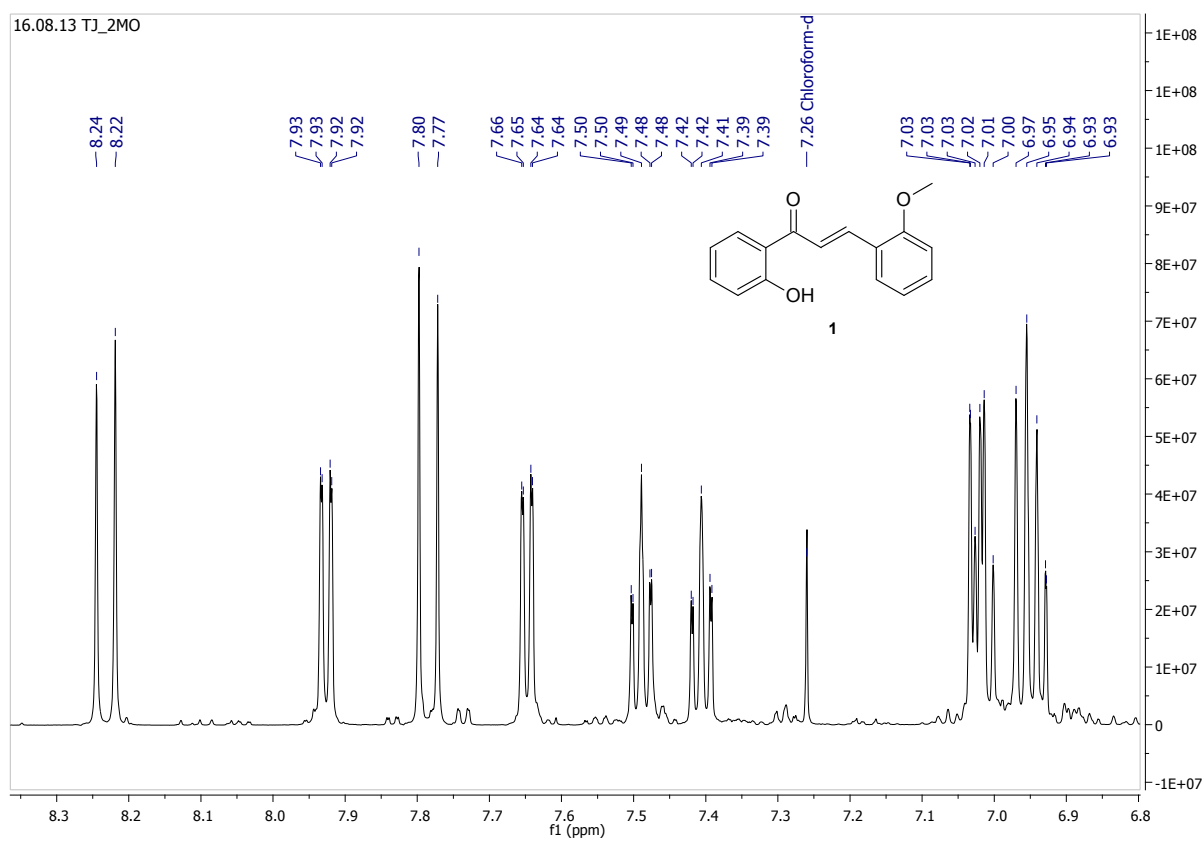

**Figure S2.** Part of the  $^1\text{H}$  NMR spectral 2'-hydroxy-2''-methoxychalcone (**1**) ( $\text{CDCl}_3$ , 600 MHz).

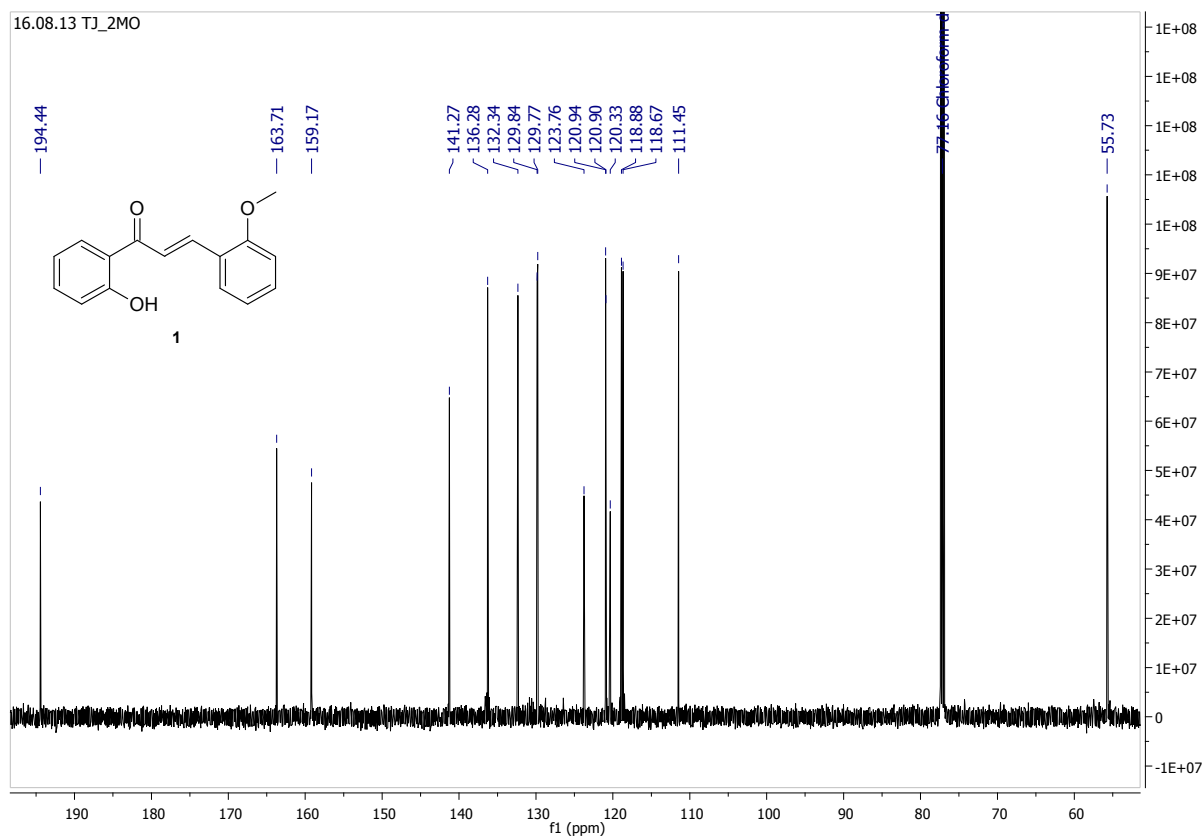

Figure S3.  $^{13}\text{C}$  NMR spectral of 2'-hydroxy-2''-methoxychalcone (**1**) (CDCl<sub>3</sub>, 151 MHz).

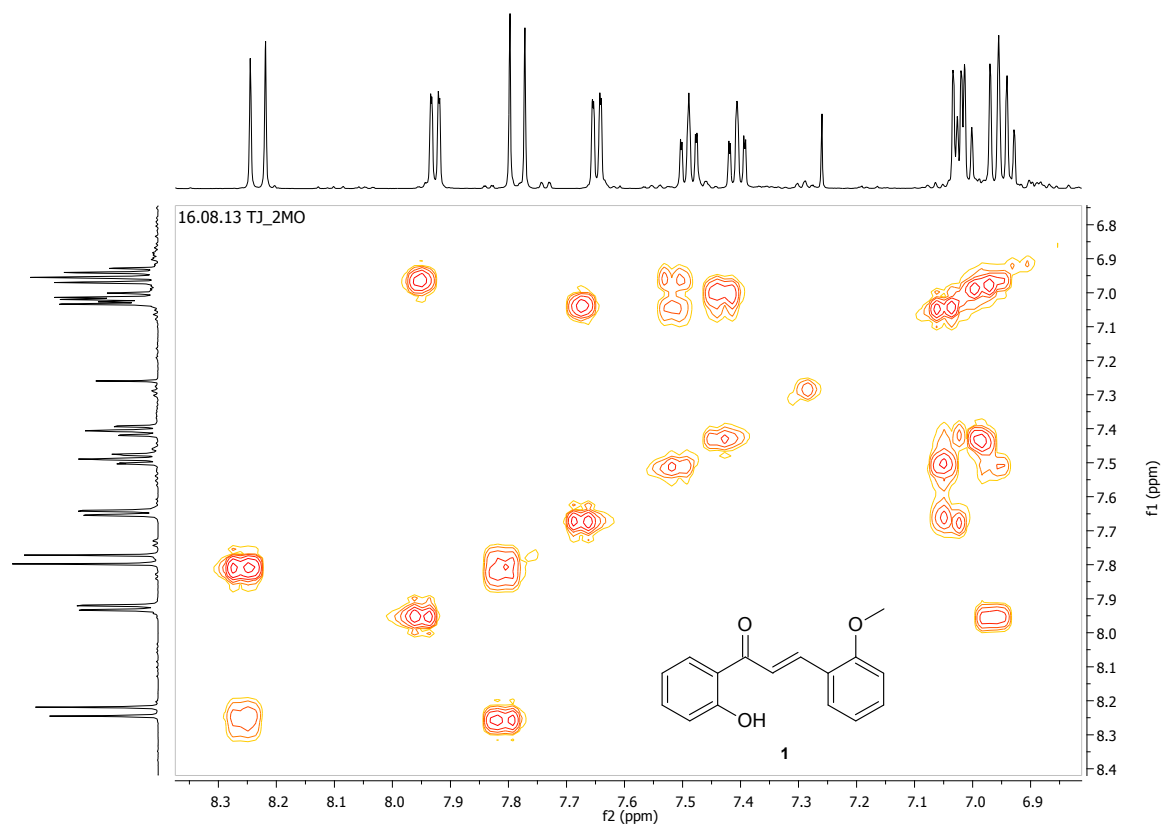

Figure S4. COSY spectral of 2'-hydroxy-2''-methoxychalcone (**1**) (CDCl<sub>3</sub>, 151 MHz).

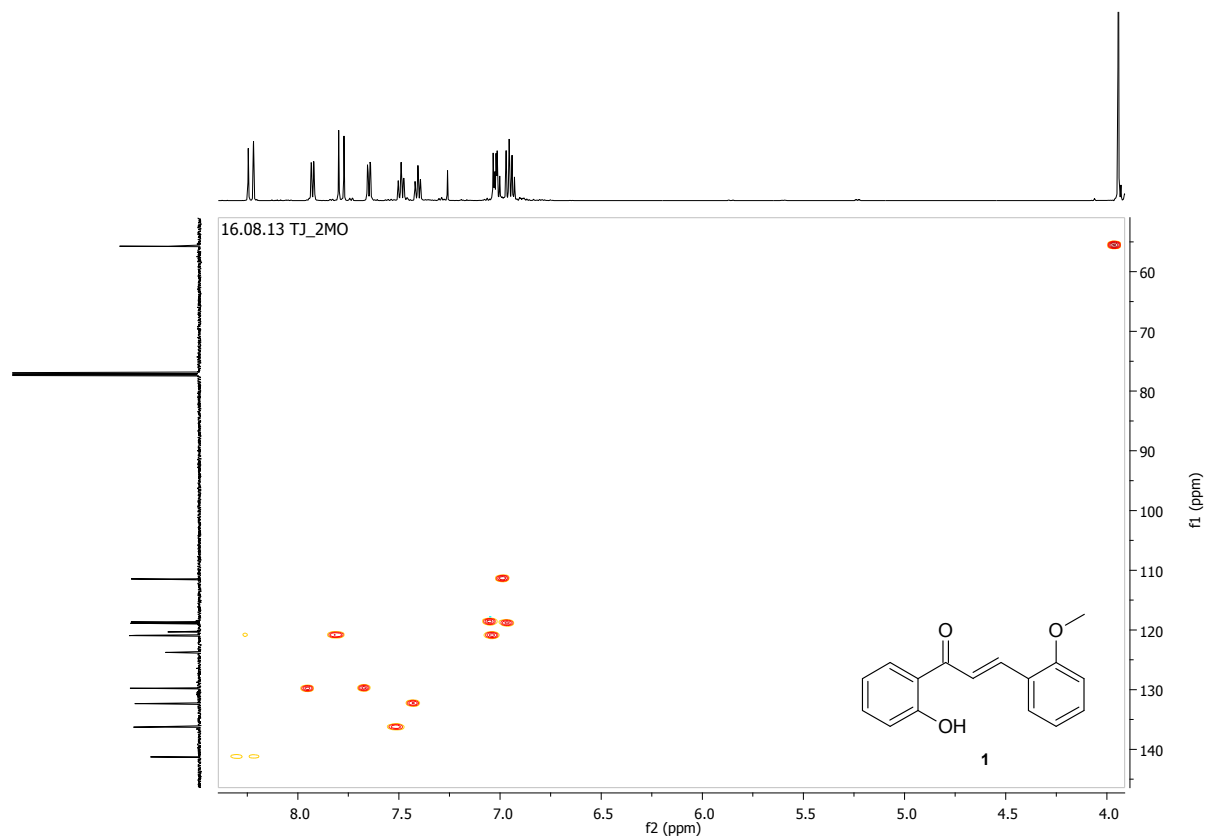

Figure S5. HSQC spectral of 2'-hydroxy-2''-methoxychalcone (1) (CDCl<sub>3</sub>, 151 MHz).

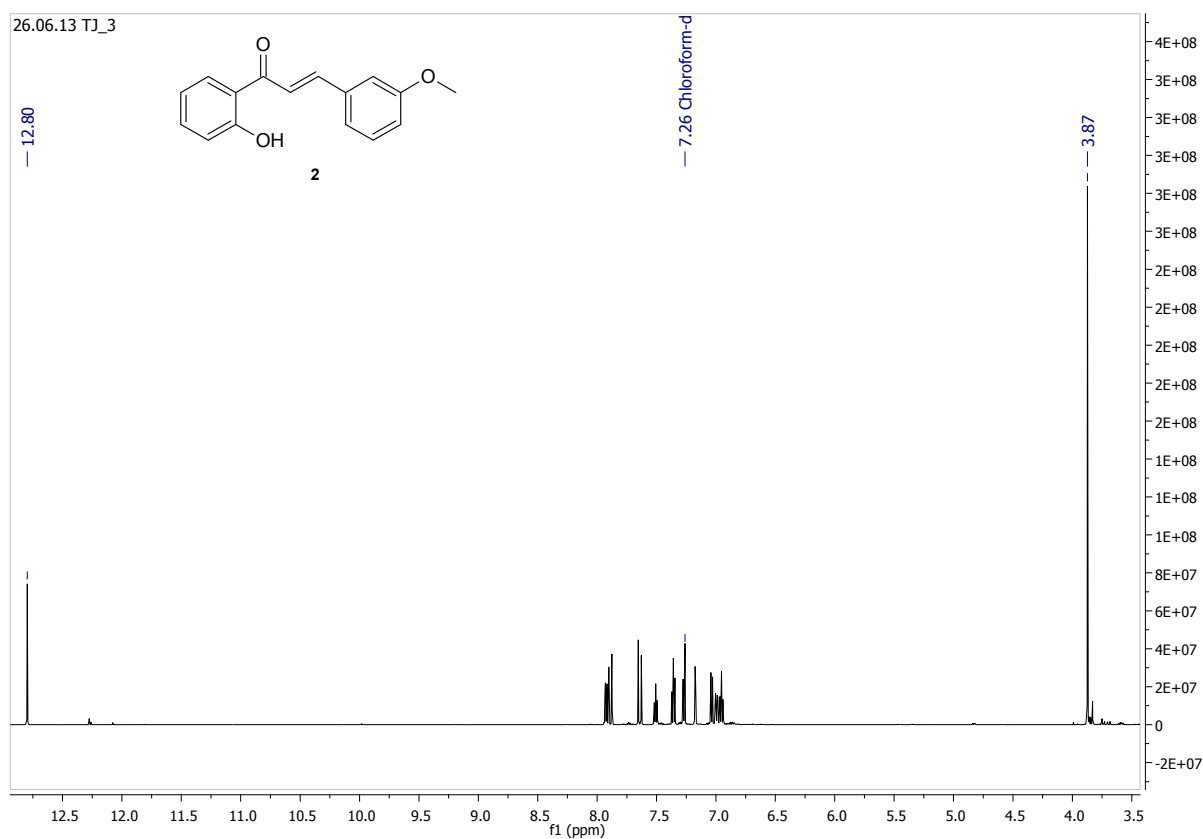

Figure S6. <sup>1</sup>H NMR spectral of 2'-hydroxy-3''-methoxychalcone (2) (CDCl<sub>3</sub>, 600 MHz).

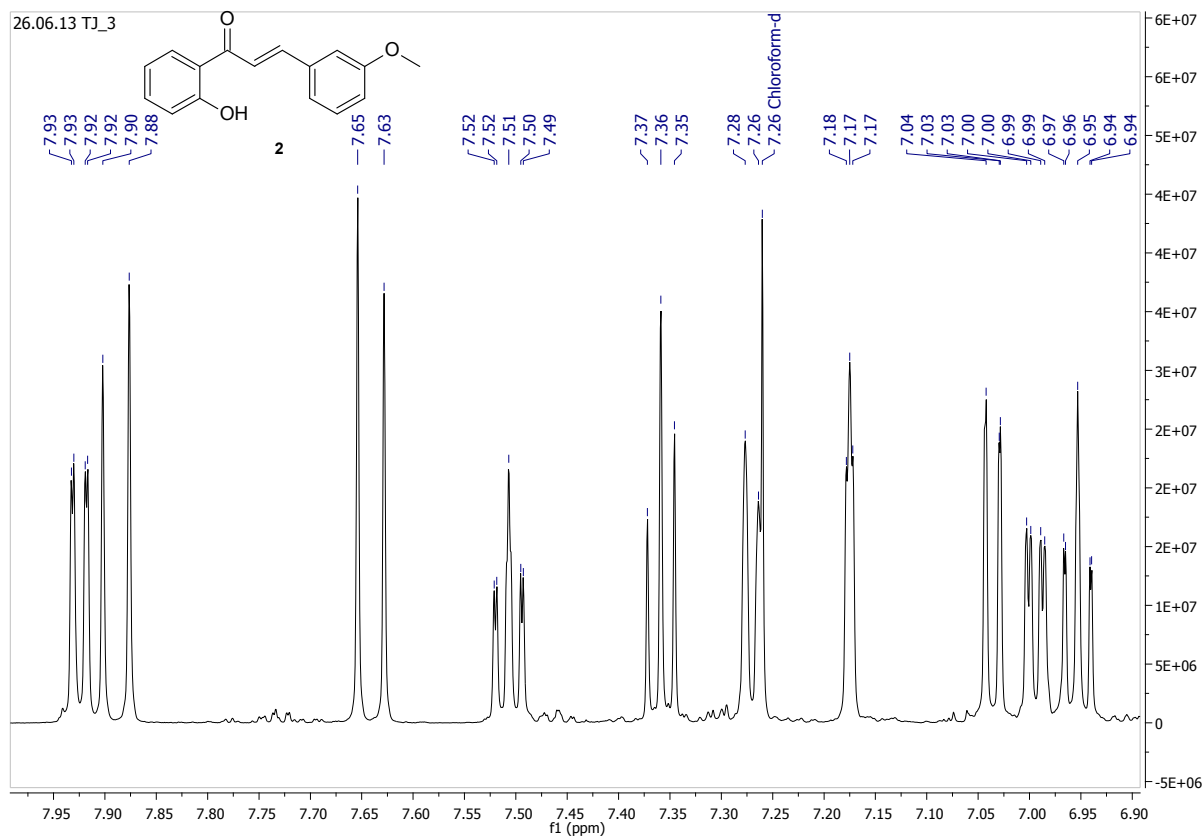

Figure S7. Part of the  $^1\text{H}$  NMR spectral 2'-hydroxy-3''-methoxychalcone (2) ( $\text{CDCl}_3$ , 600 MHz).

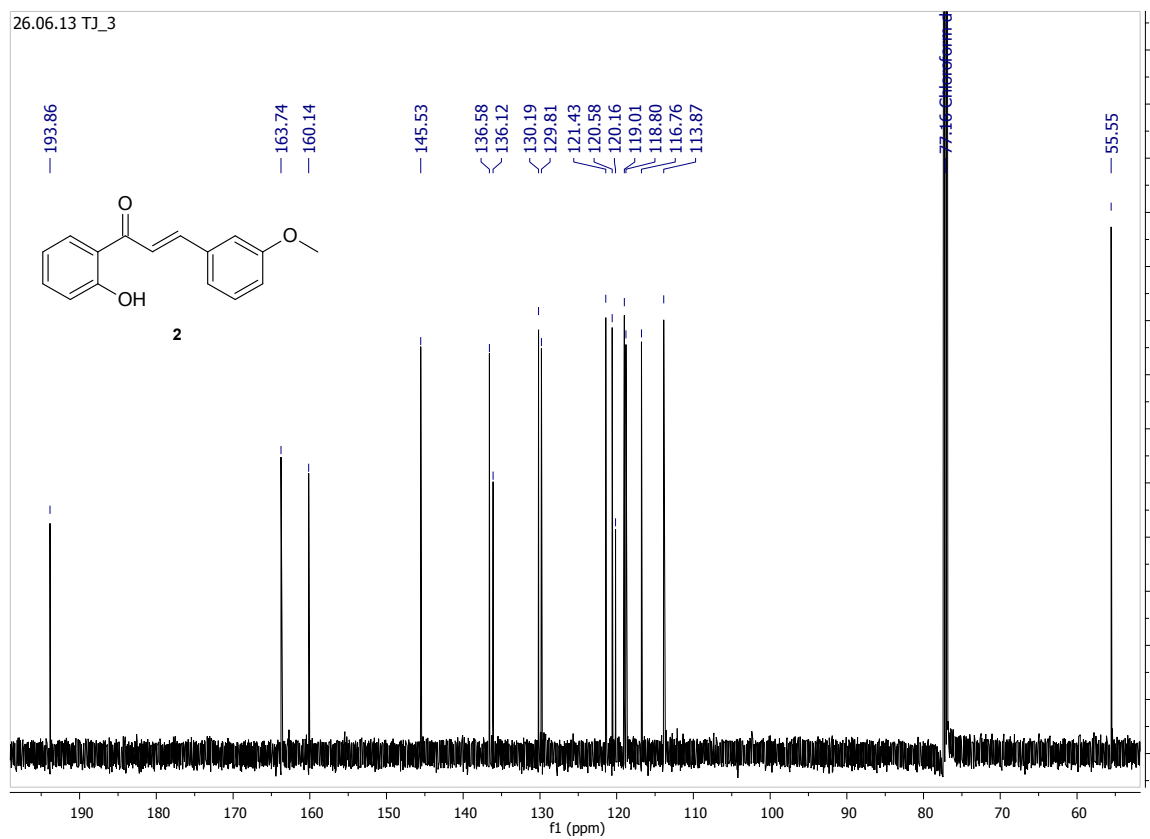

Figure S8.  $^{13}\text{C}$  NMR spectral of 2'-hydroxy-3''-methoxychalcone (2) ( $\text{CDCl}_3$ , 151 MHz).

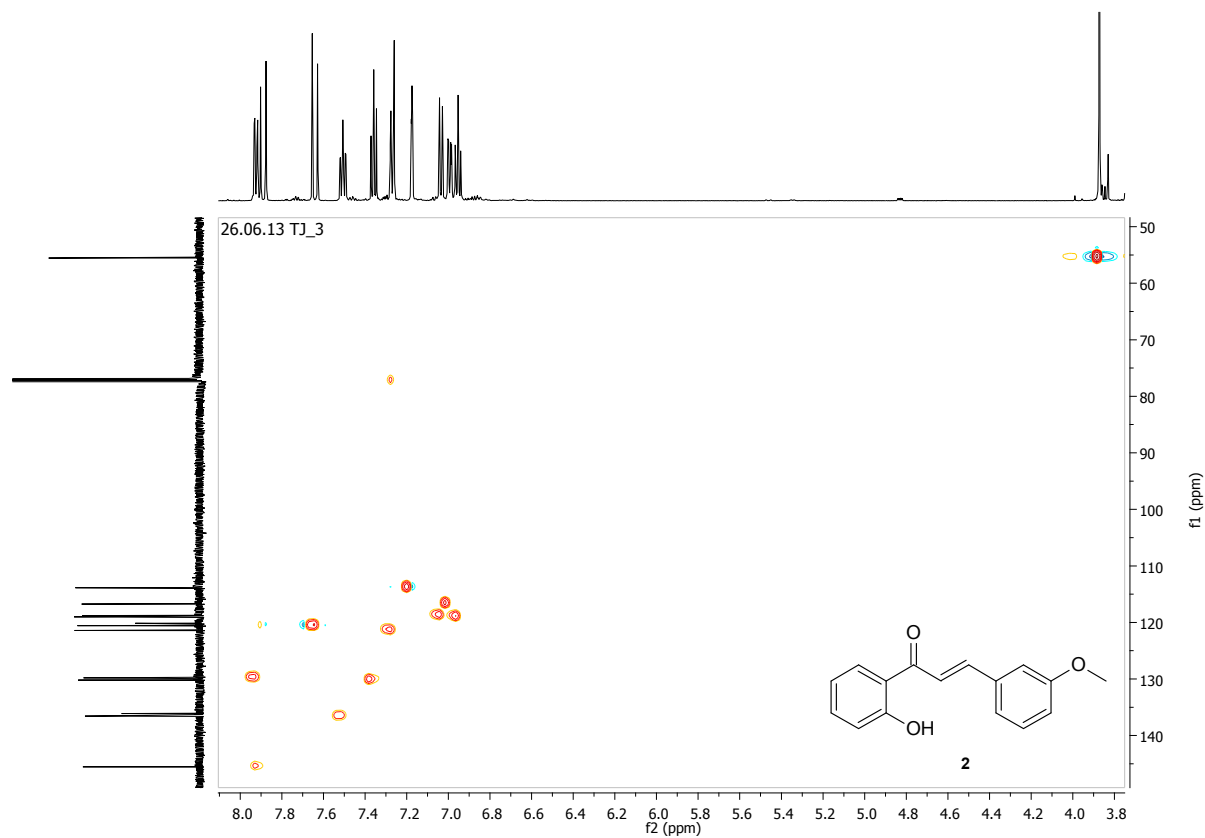

Figure S9. HSQC spectral of 2'-hydroxy-3''-methoxychalcone (**2**) ( $\text{CDCl}_3$ , 151 MHz).

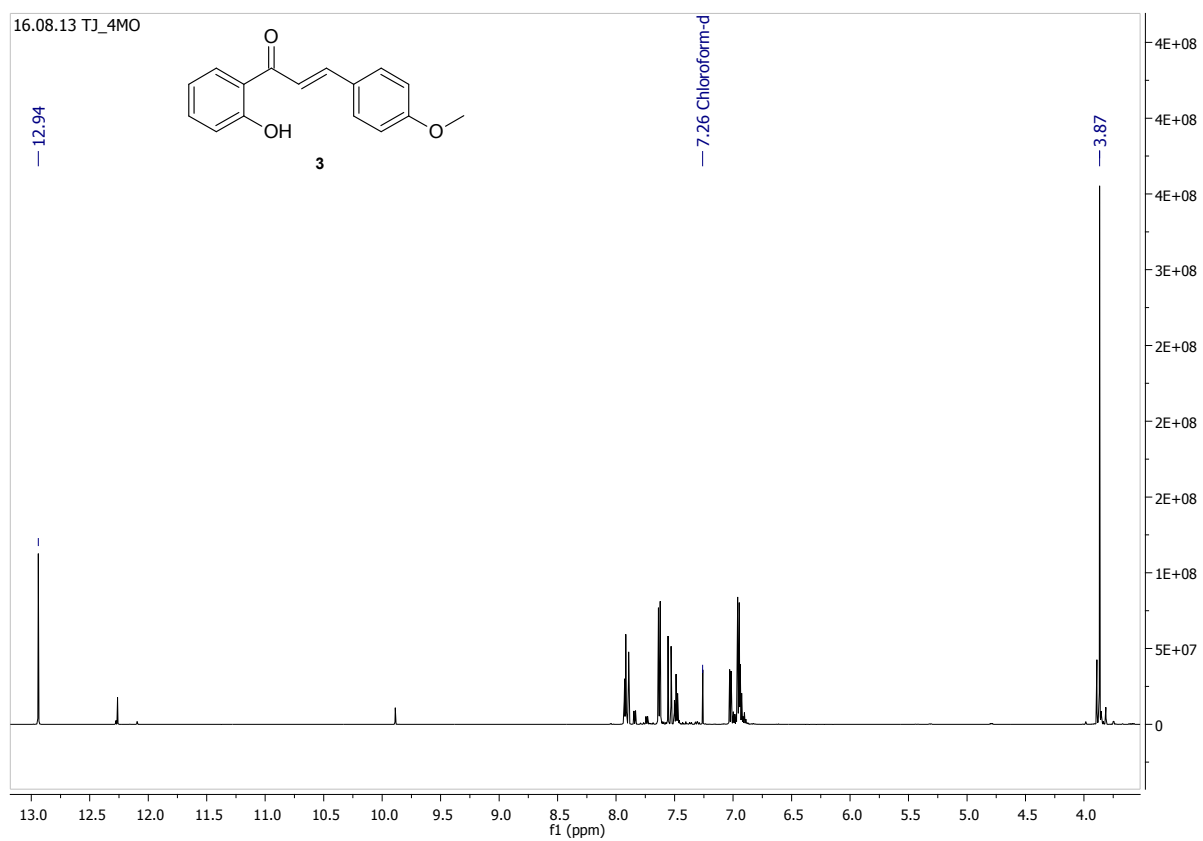

Figure S10.  $^1\text{H}$  NMR spectral of 2'-hydroxy-4''-methoxychalcone (**3**) ( $\text{CDCl}_3$ , 600 MHz).

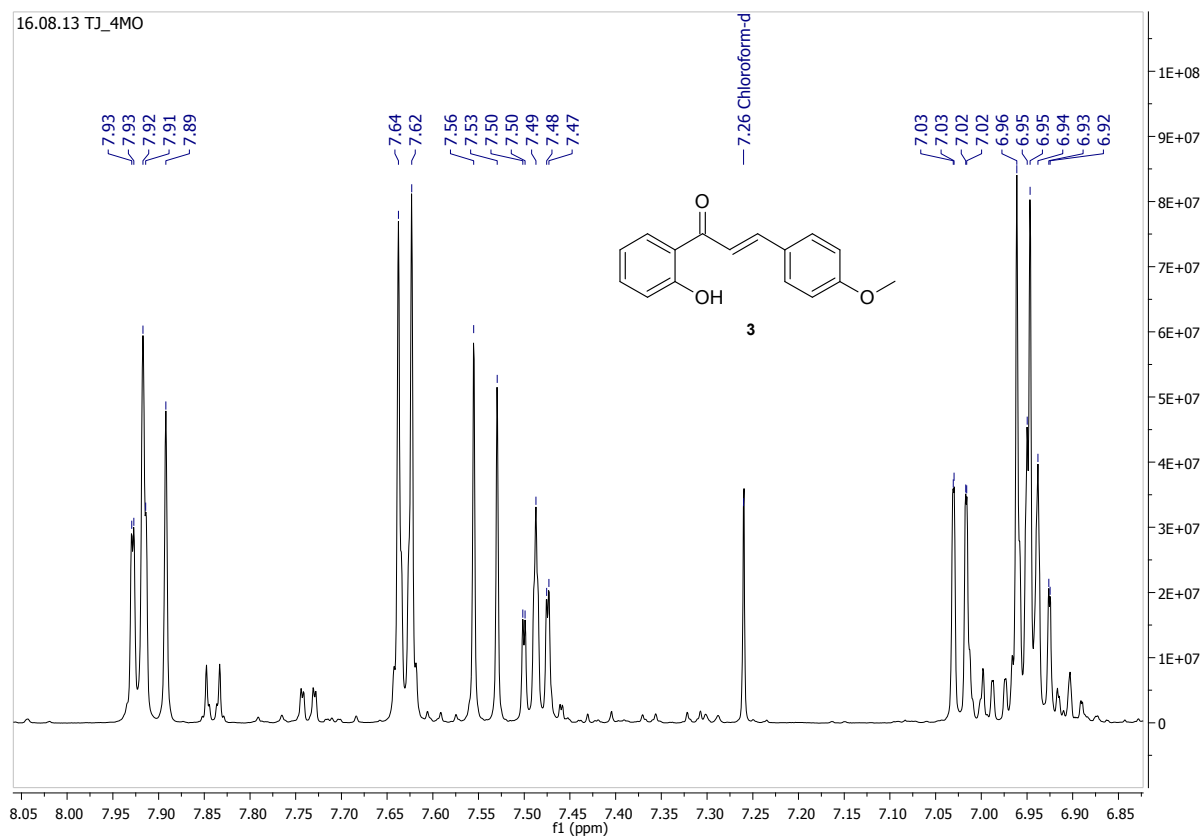

Figure S11. Part of the  $^1\text{H}$  NMR spectral 2'-hydroxy-4''-methoxychalcone (3) ( $\text{CDCl}_3$ , 600 MHz).

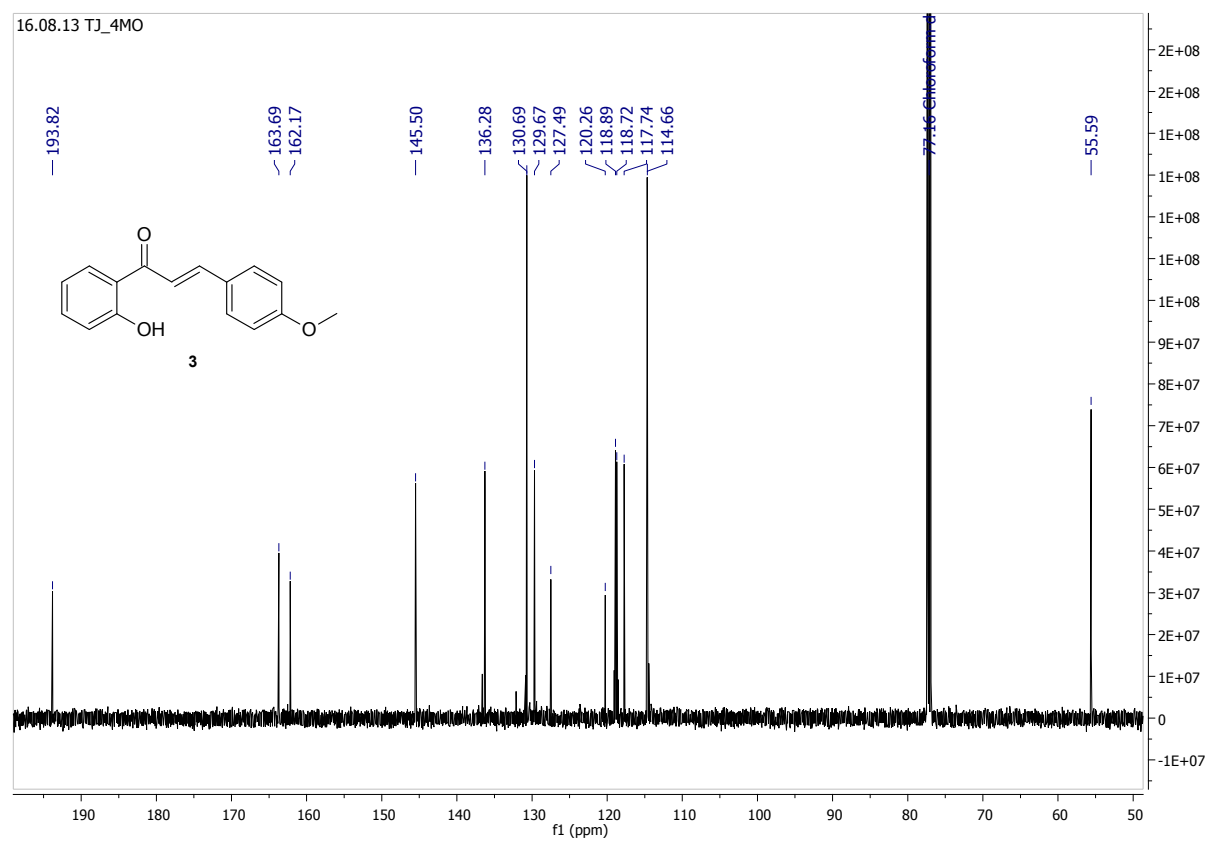

Figure S12.  $^{13}\text{C}$  NMR spectral of 2'-hydroxy-4''-methoxychalcone (3) ( $\text{CDCl}_3$ , 151 MHz).

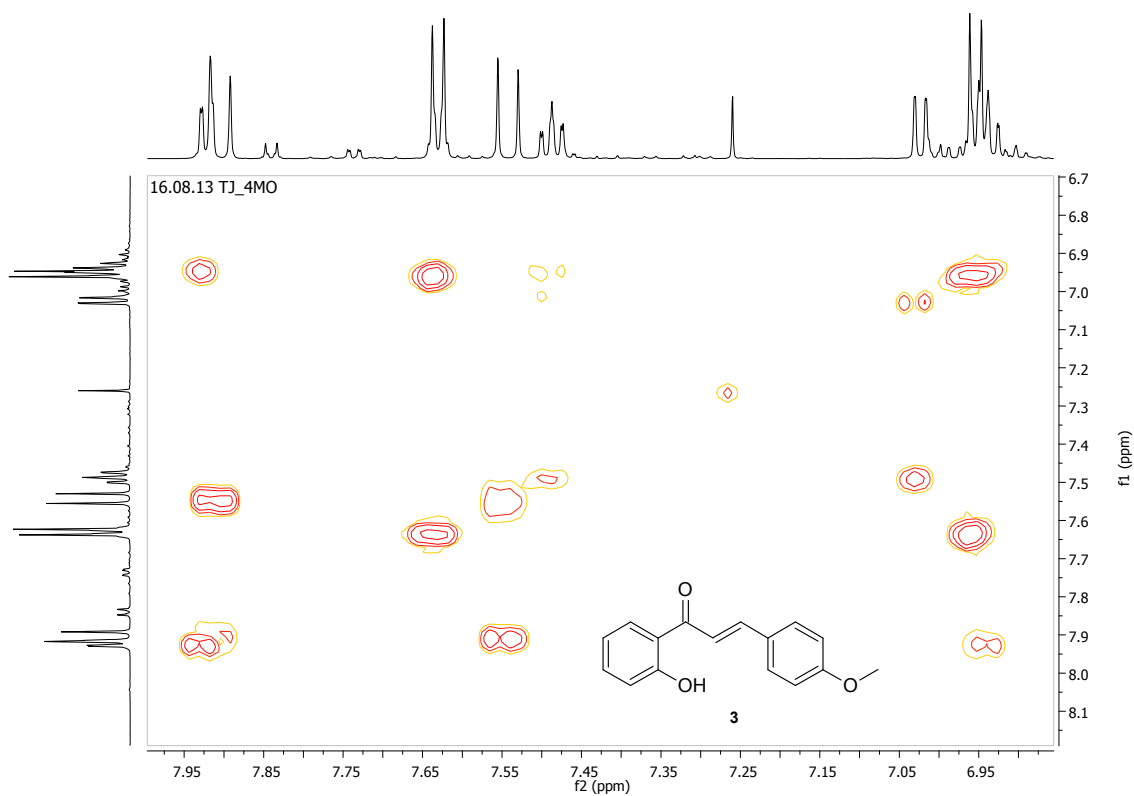

Figure S13. COSY spectral of 2'-hydroxy-4''-methoxychalcone (**3**) (CDCl<sub>3</sub>, 151 MHz).

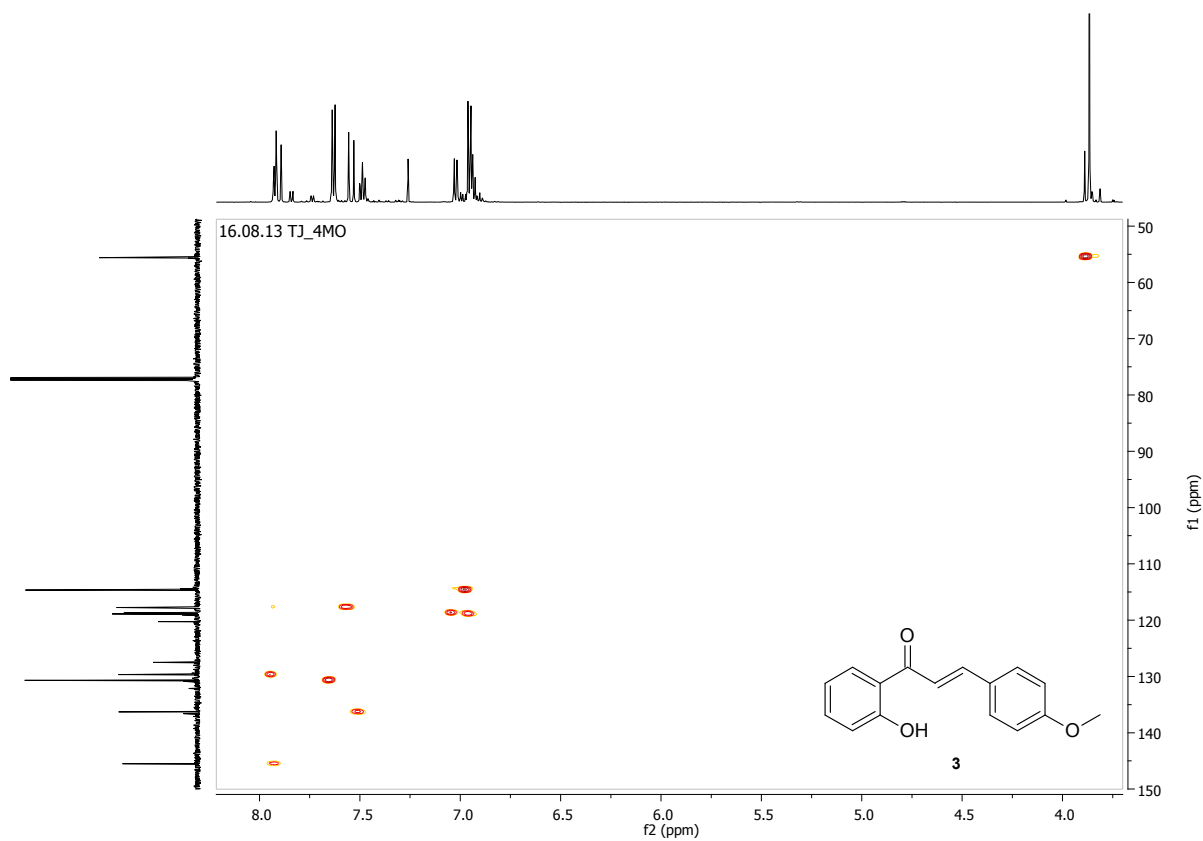

Figure S14. HSQC spectral of 2'-hydroxy-4''-methoxychalcone (**3**) (CDCl<sub>3</sub>, 151 MHz).



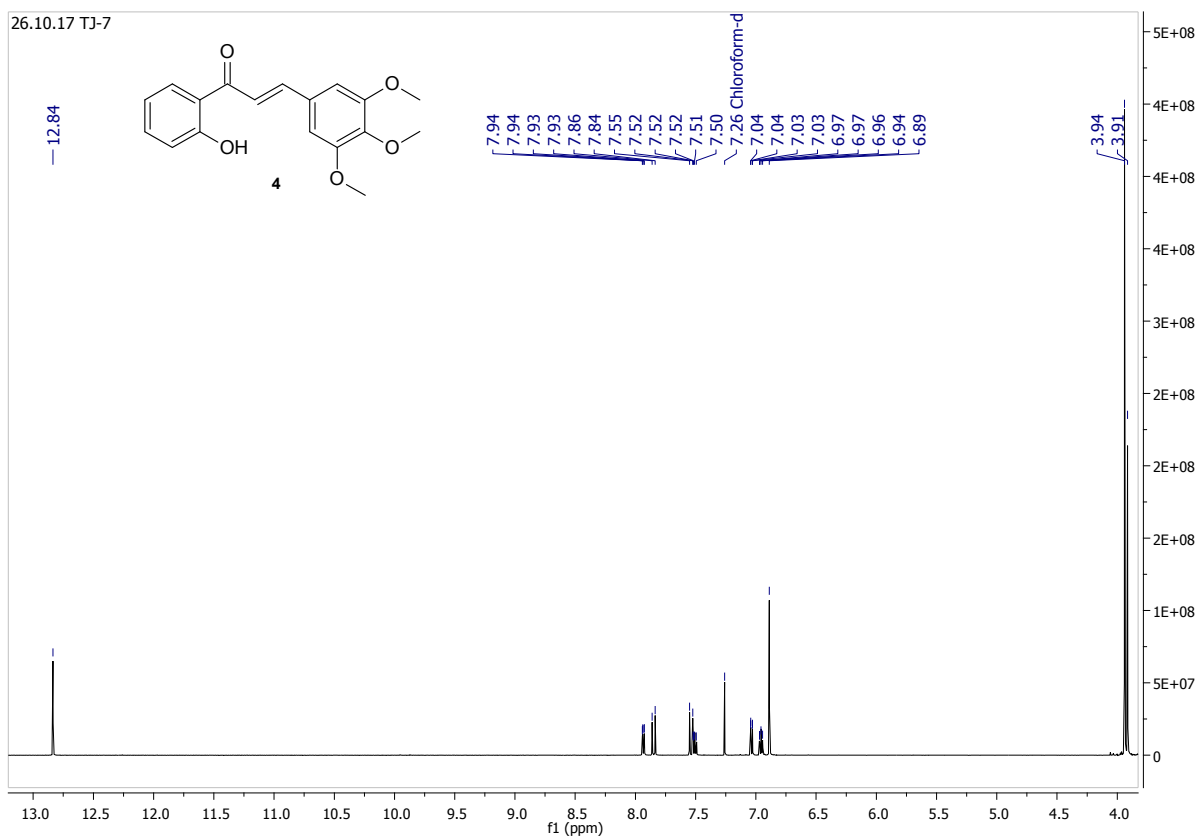

**Figure S15.**  $^1\text{H}$  NMR spectral of 2'-hydroxy-3'',4'',5''-trimethoxychalcone (4) ( $\text{CDCl}_3$ , 600 MHz).

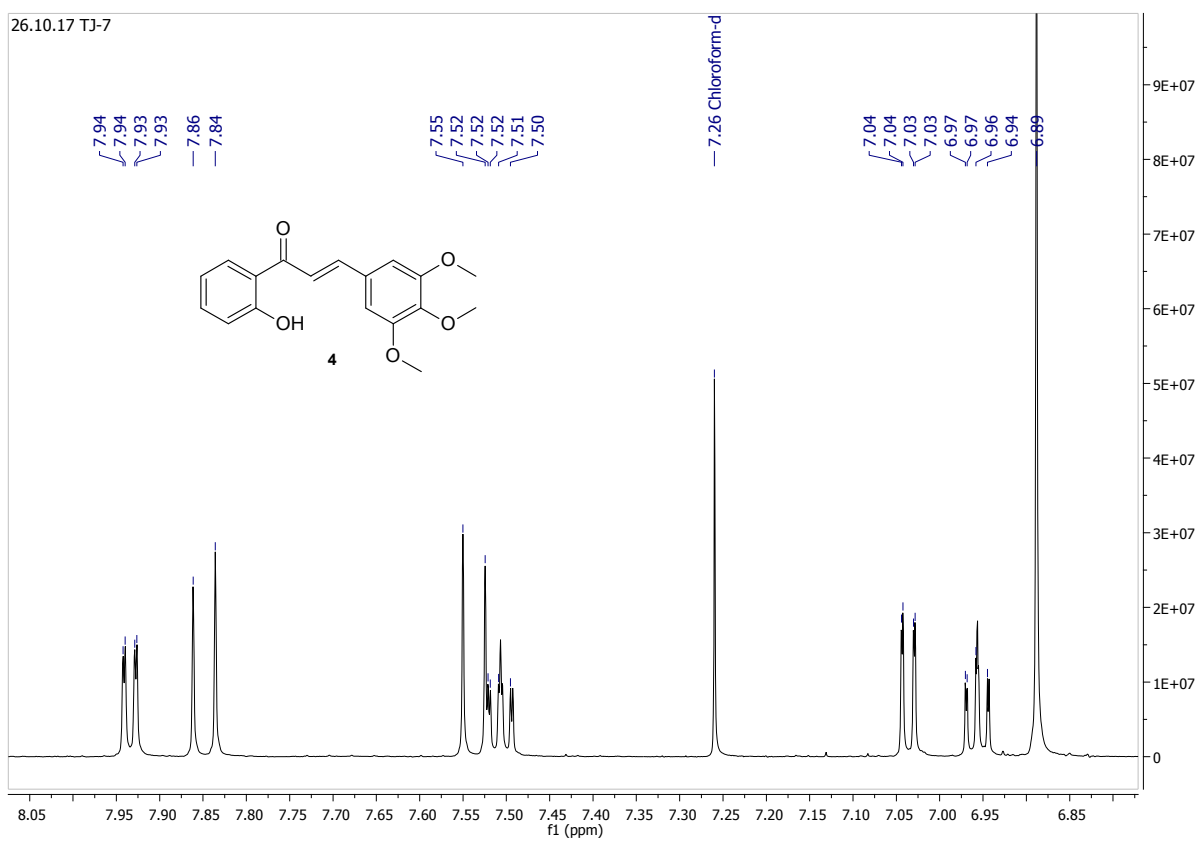

**Figure S16.** Part of the  $^1\text{H}$  NMR spectral 2'-hydroxy-3'',4'',5''-trimethoxychalcone (4) ( $\text{CDCl}_3$ , 600 MHz).

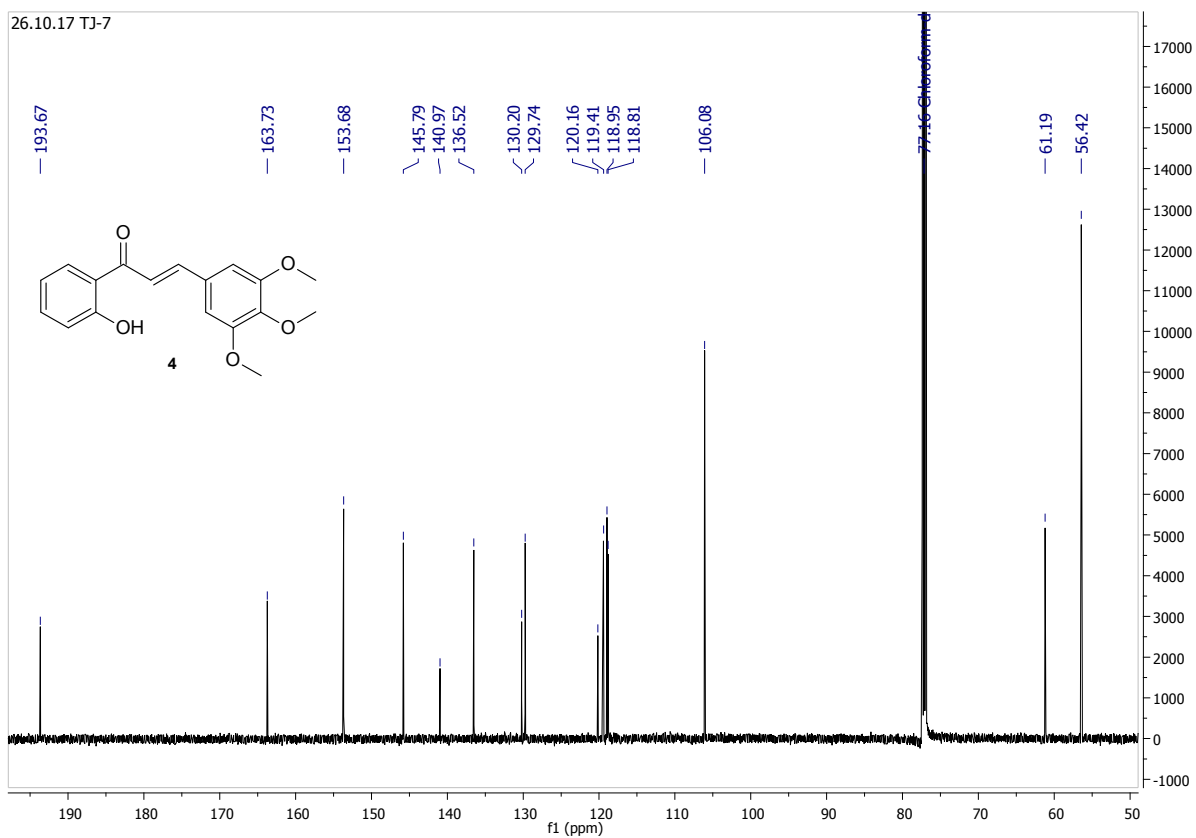

Figure S17. <sup>13</sup>C NMR spectral of 2'-hydroxy-3'',4'',5''-trimethoxychalcone (4) (CDCl<sub>3</sub>, 151 MHz).

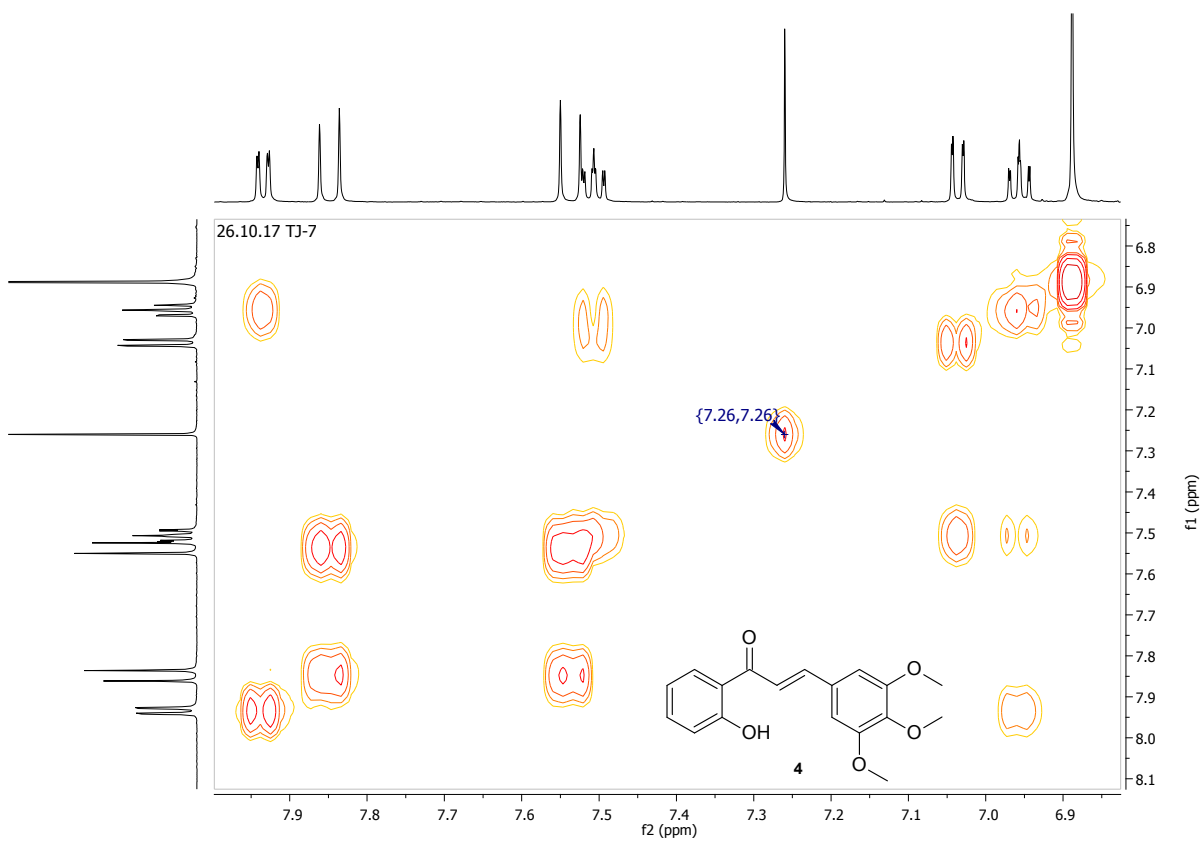

Figure S18. COSY spectral of 2'-hydroxy-3'',4'',5''-trimethoxychalcone (4) (CDCl<sub>3</sub>, 151 MHz).

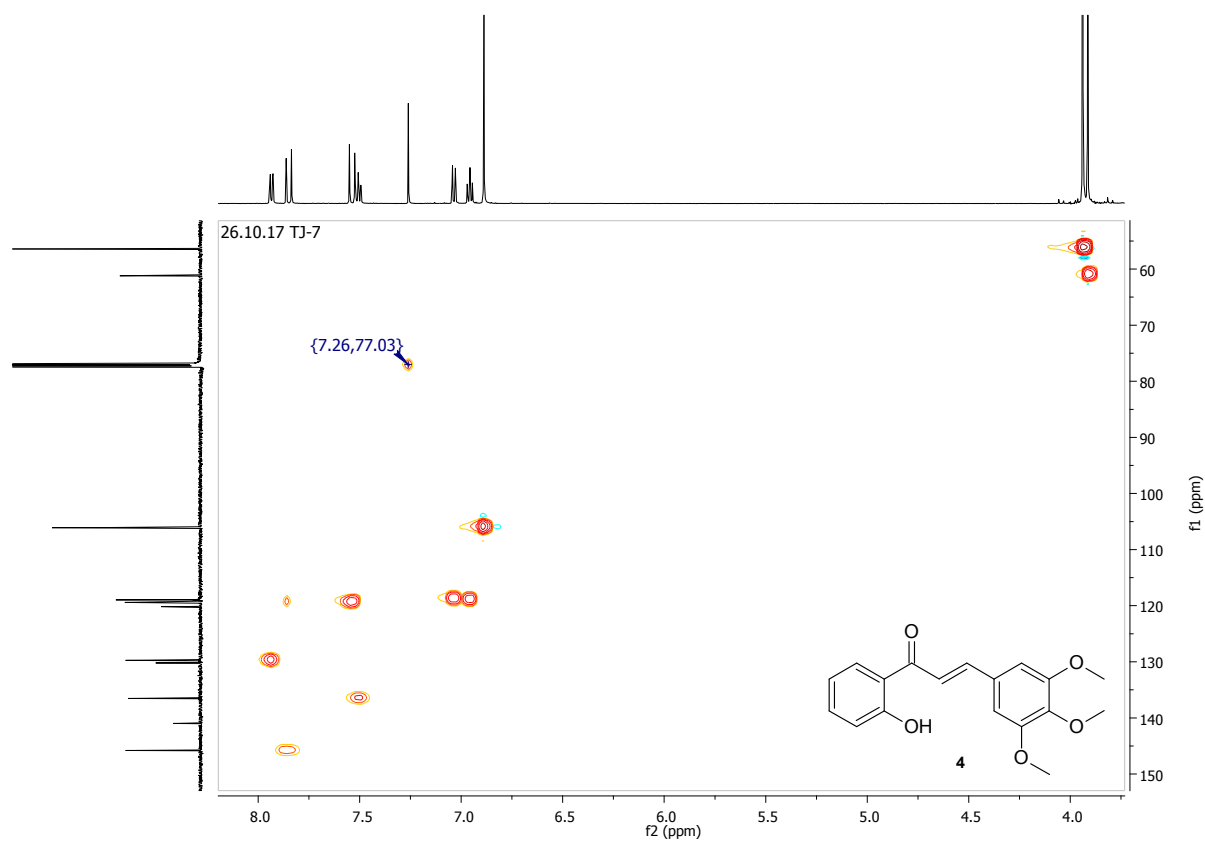

Figure S19. HSQC spectral of 2'-hydroxy-3'',4'',5''-trimethoxychalcone (4) (CDCl<sub>3</sub>, 151 MHz).

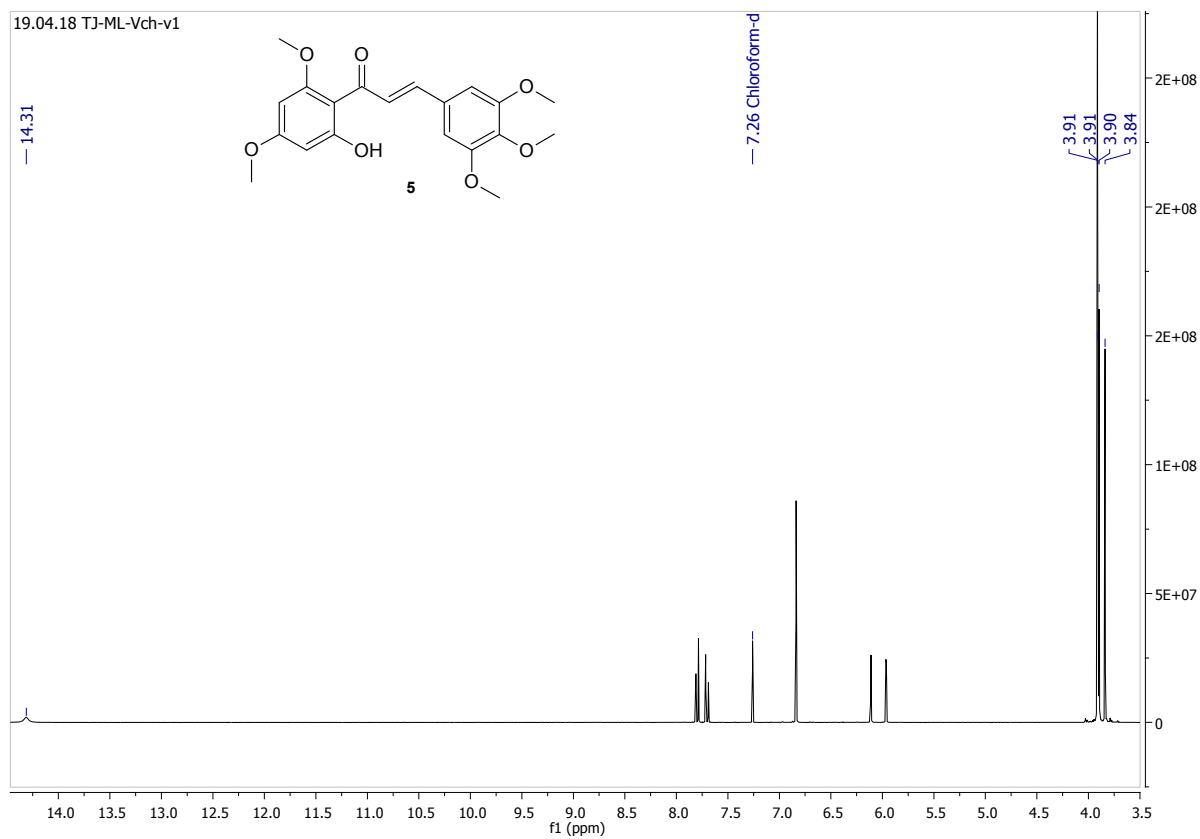

Figure S20. <sup>1</sup>H NMR spectral of 2'-hydroxy-4',6',3'',4'',5''-pentamethoxychalcone (5) (CDCl<sub>3</sub>, 600 MHz).

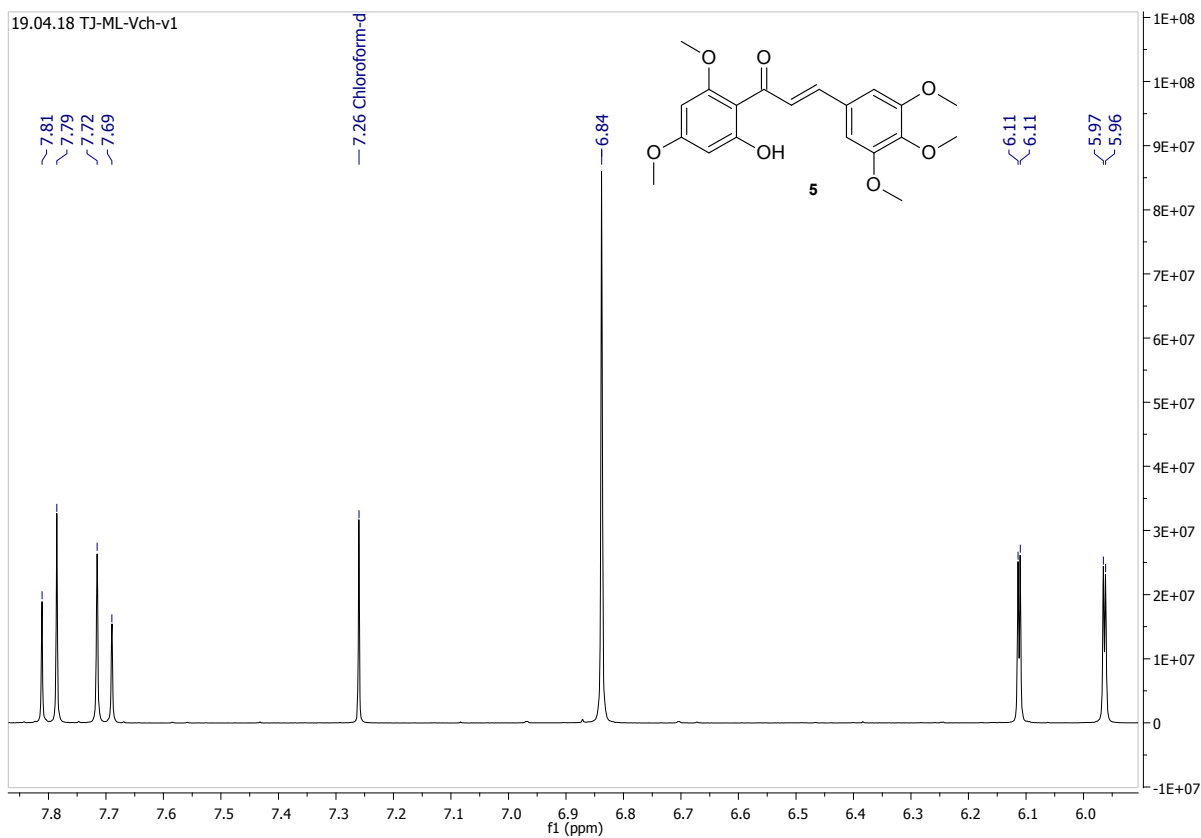

**Figure S21.** Part of the  $^1\text{H}$  NMR spectral 2'-hydroxy-4',6',3'',4'',5''-pentamethoxychalcone (5) ( $\text{CDCl}_3$ , 600 MHz).

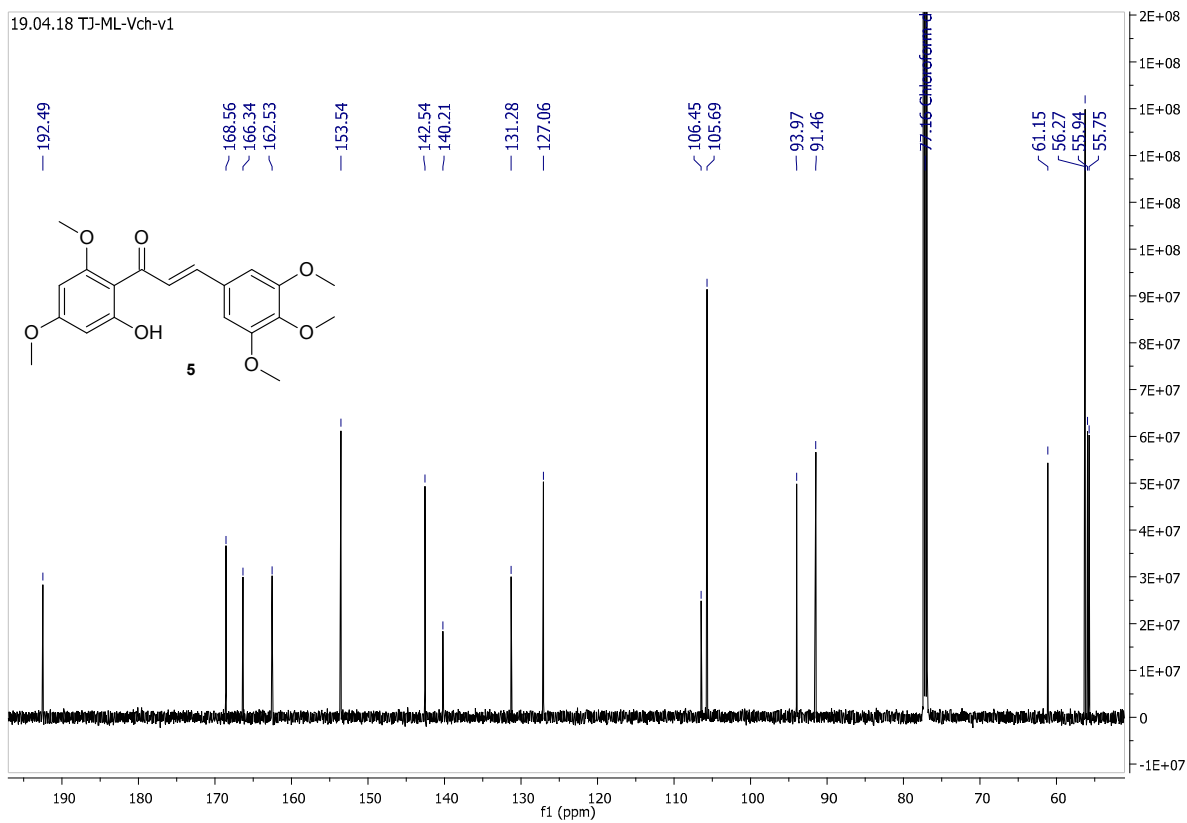

**Figure S22.**  $^{13}\text{C}$  NMR spectral of 2'-hydroxy-4',6',3'',4'',5''-pentamethoxychalcone (5) ( $\text{CDCl}_3$ , 151 MHz).

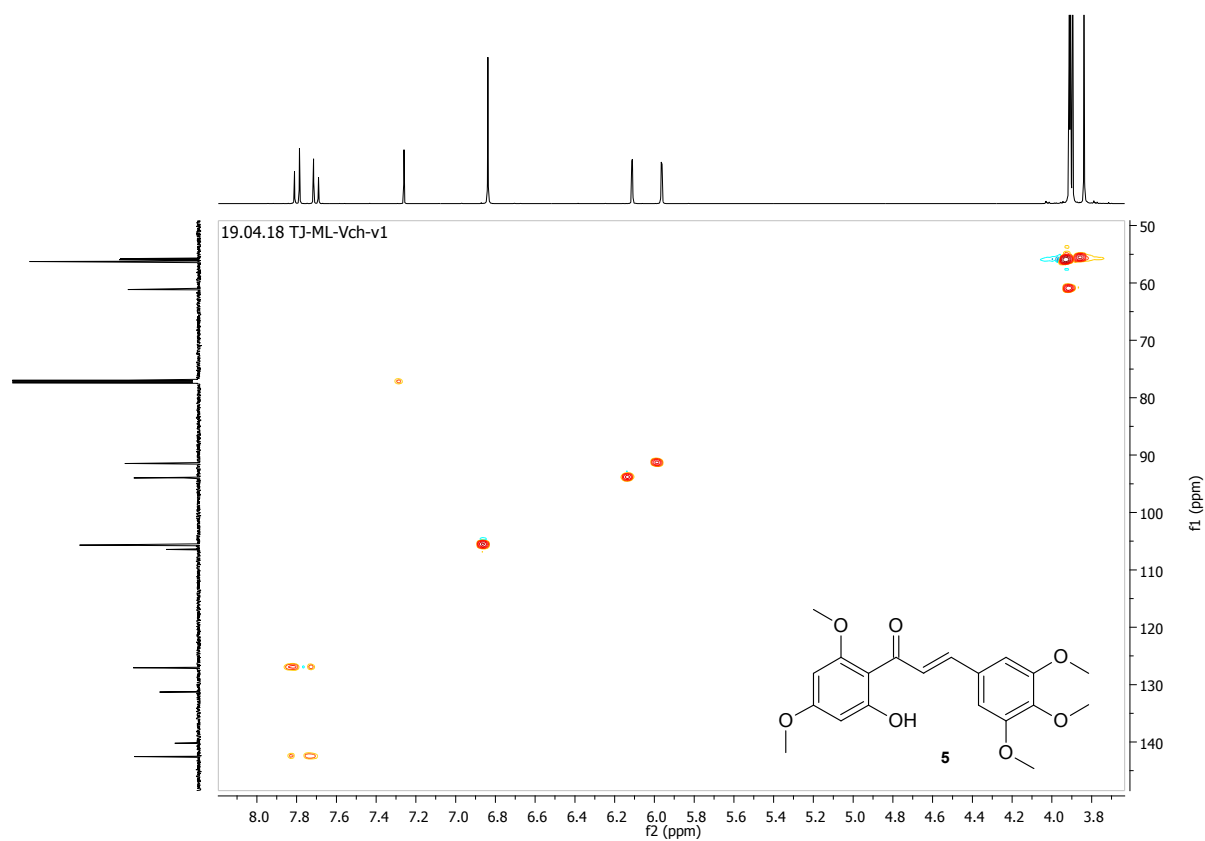

Figure S23. HSQC spectral of 2'-hydroxy-4',6',3'',4'',5''-pentamethoxychalcone (5) (CDCl<sub>3</sub>, 151 MHz).

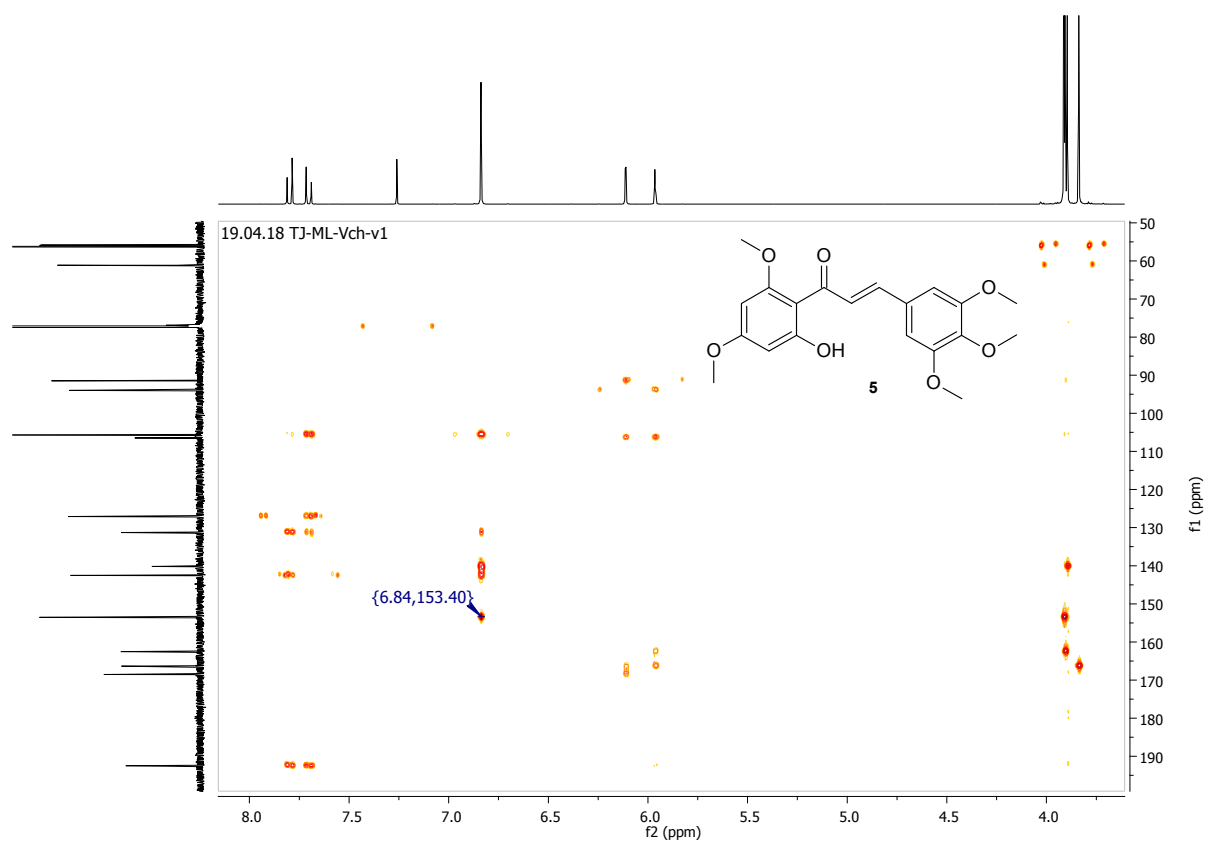

Figure S24. HMBC spectral of 2'-hydroxy-4',6',3'',4'',5''-pentamethoxychalcone (5) (CDCl<sub>3</sub>, 151 MHz).

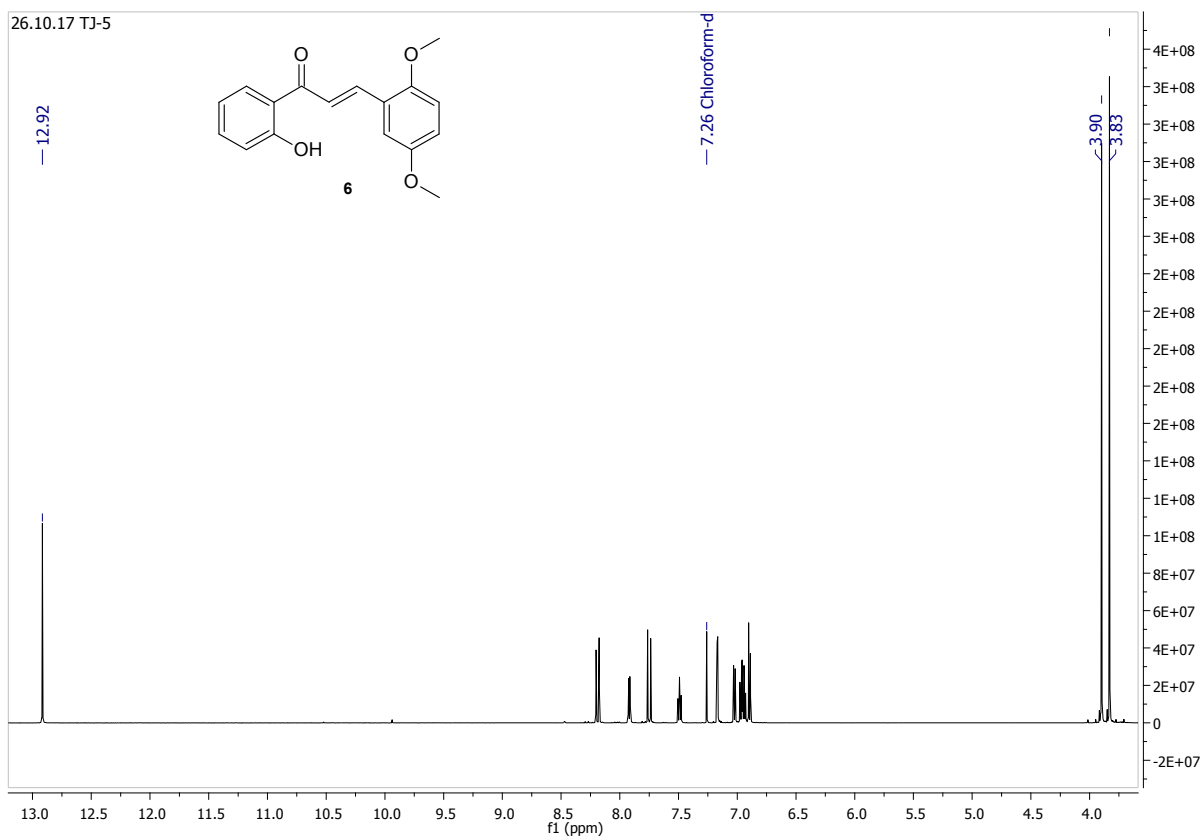

Figure S25.  $^1\text{H}$  NMR spectral of 2'-hydroxy-2'',5''-dimethoxychalcone (**6**) ( $\text{CDCl}_3$ , 600 MHz).

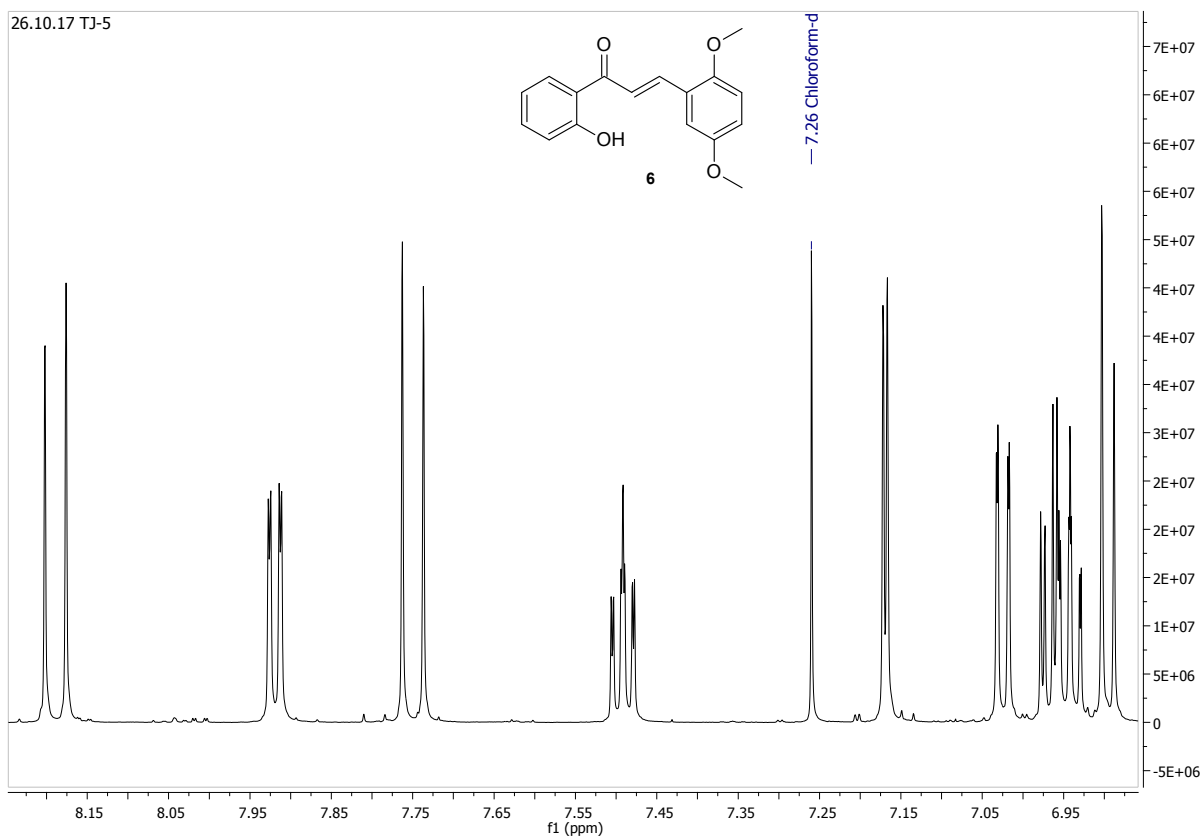

Figure S26. Part of the  $^1\text{H}$  NMR spectral 2'-hydroxy-2'',5''-dimethoxychalcone (**6**) ( $\text{CDCl}_3$ , 600 MHz).

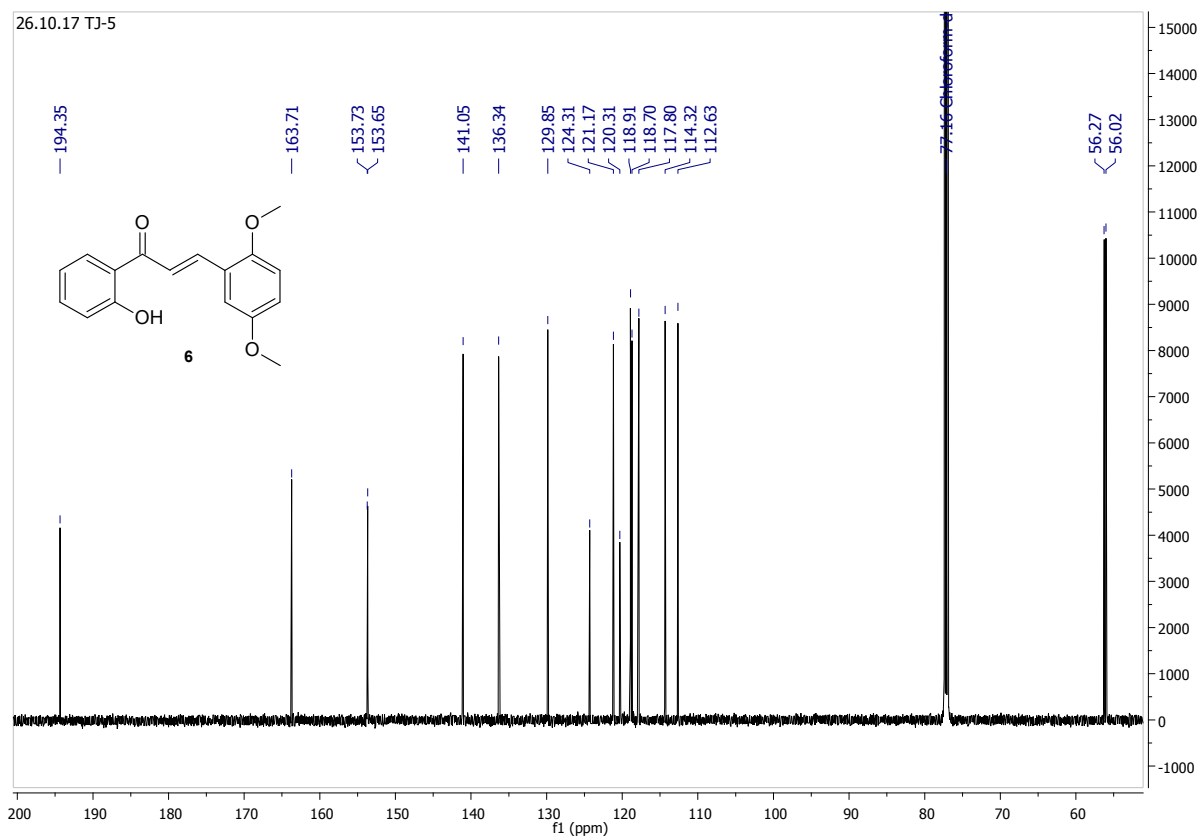

Figure S27. <sup>13</sup>C NMR spectral of 2'-hydroxy-2'',5''-dimethoxychalcone (6) (CDCl<sub>3</sub>, 151 MHz).

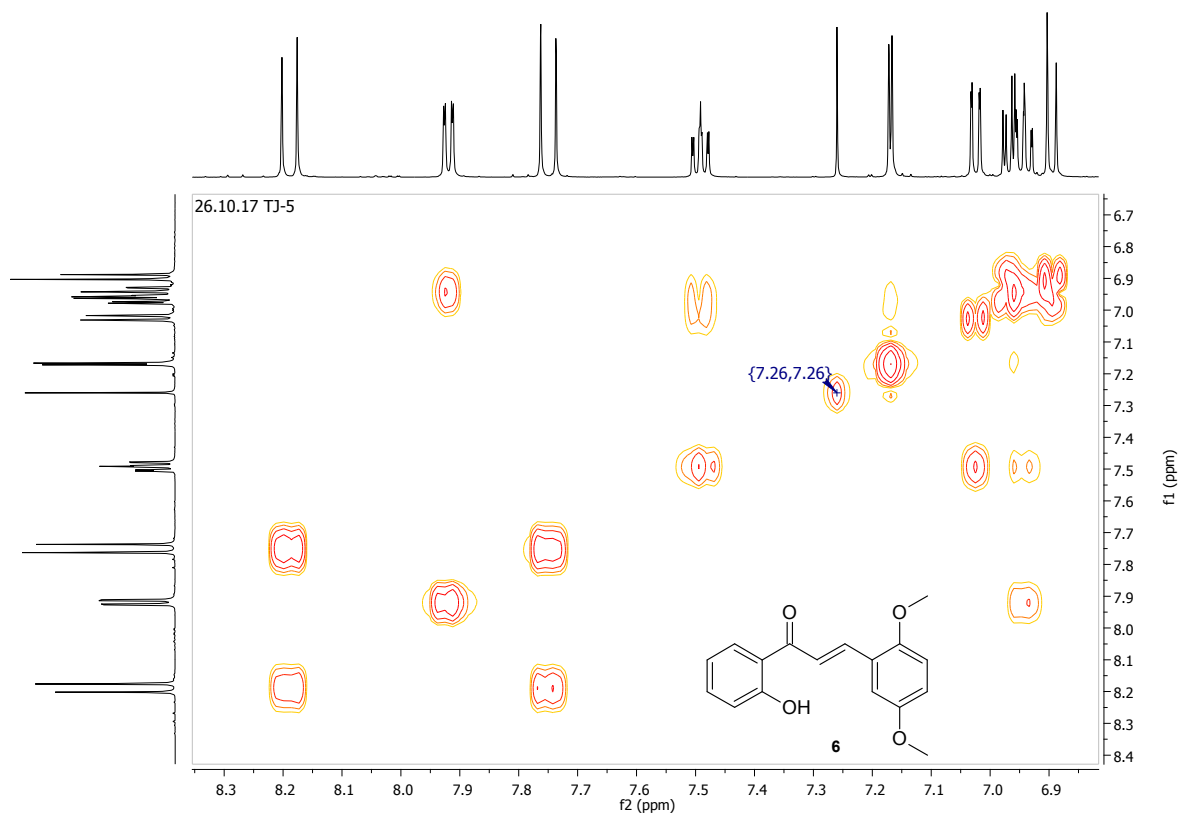

Figure S28. COSY spectral of 2'-hydroxy-2'',5''-dimethoxychalcone (6) (CDCl<sub>3</sub>, 151 MHz).

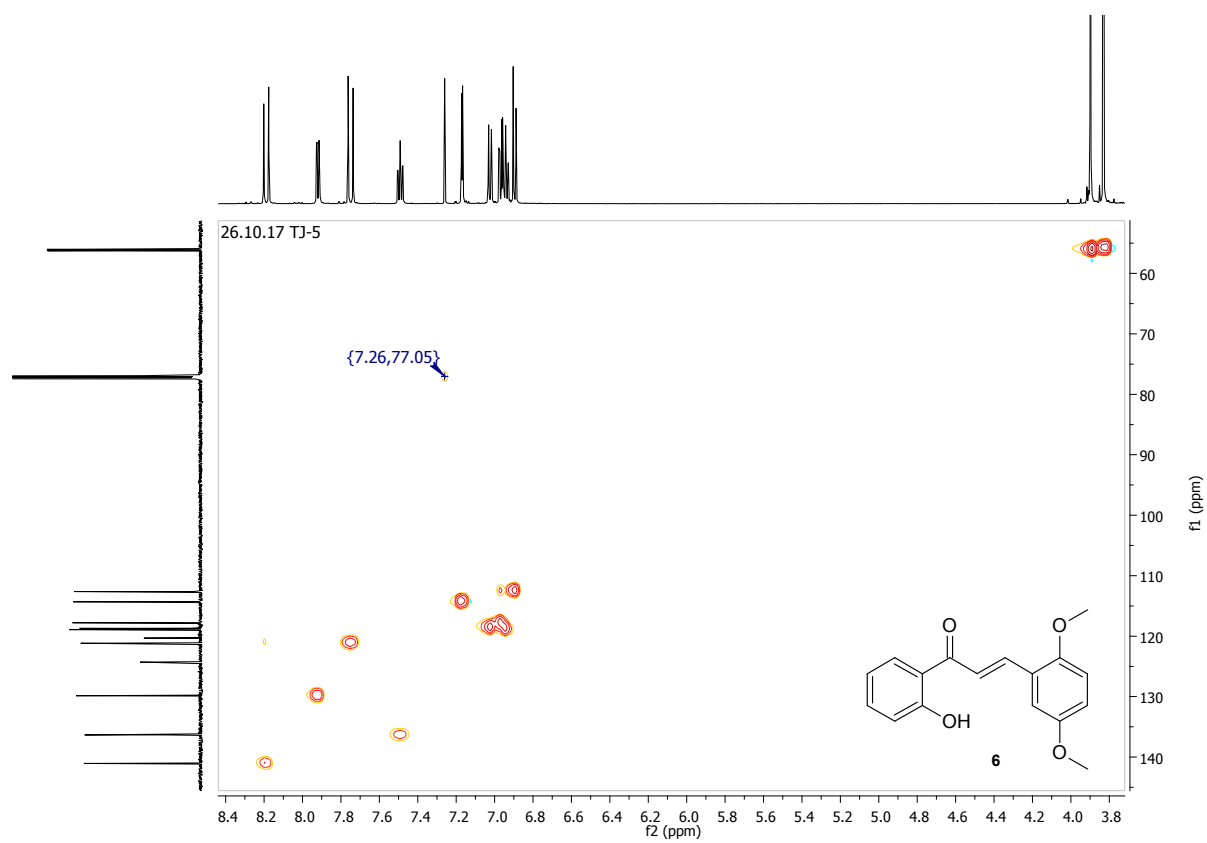

Figure S29. HSQC spectral of 2'-hydroxy-2'',5''-dimethoxychalcone (6) (CDCl<sub>3</sub>, 151 MHz).
